# Supplementary material for: Unveiling the thermodynamic and kinetic properties of NaxFe(SO4)2 (x = 0–2): toward a high-capacity and low-cost cathode material
Source: Royal Society of Chemistry journal article supplement (doi:10.1039/c6ta05330k), 2016-01-01

Supporting Information

# Unveiling the thermodynamic and kinetic properties of Eldfellite, $\text{NaFe}(\text{SO}_4)_2$ : toward a high-capacity and low-cost cathode material

Amitava Banerjee<sup>\*a</sup>, Rafael B. Araujo<sup>\*a</sup> and Rajeev Ahuja<sup>a,b</sup>

<sup>a</sup>Condensed Matter Theory Group, Department of Physics and Astronomy, Box 516, Uppsala University, S-75120 Uppsala, Sweden.

<sup>b</sup>Applied Materials Physics, Department of Materials and Engineering, Royal Institute of Technology (KTH), S-100 44 Stockholm, Sweden.

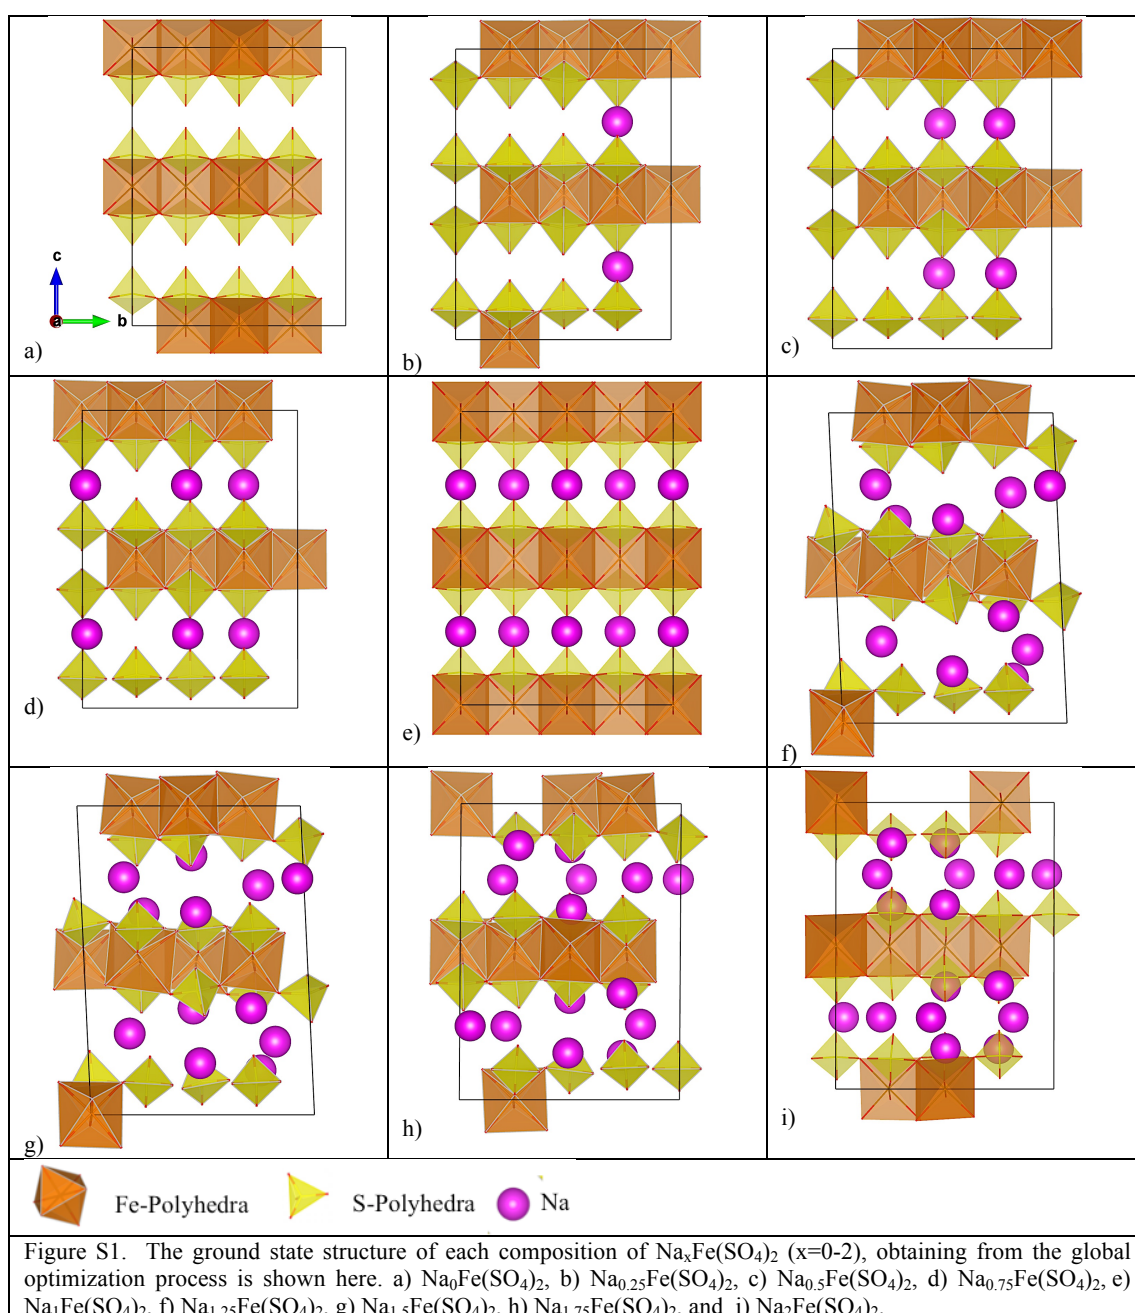

Supplement: c6ta05330k1.pdf [file c6ta05330k1.pdf]
